# Supplementary material
Source: PubMed Central journal article supplement (PMC2656667)
Supplement: supp_P800042-JLR200_Suppdata.pdf [file supp_P800042-JLR200_Suppdata.pdf]

**Supplementary Table 1.** Multivariate analysis of the association of changes in plasma sterol with changes in total and LDL cholesterol levels during statin treatment.

|                                        | Standardized Beta Coefficient | p value |
|----------------------------------------|-------------------------------|---------|
| <i>Δ Total cholesterol model*</i>      |                               |         |
| Age, y                                 | -0.165                        | 0.056   |
| Gender, m/f                            | -0.136                        | 0.112   |
| Treatment, rosuvastatin / atorvastatin | 0.015                         | 0.859   |
| Δ Lathosterol, μmol/L                  | 0.372                         | <0.001  |
| Δ Campesterol, μmol/L                  | 0.254                         | 0.003   |
| <i>Δ LDL cholesterol model†</i>        |                               |         |
| Age, y                                 | -0.164                        | 0.069   |
| Gender, m/f                            | -0.117                        | 0.190   |
| Treatment, rosuvastatin / atorvastatin | 0.051                         | 0.576   |
| Δ Lathosterol, μmol/L                  | 0.304                         | 0.001   |
| Δ Campesterol, μmol/L                  | 0.255                         | 0.005   |

In the linear regression models, changes in total cholesterol (in mg/dL) served as outcome variable, while age, gender, statin treatment, total cholesterol levels at baseline and changes in both the absolute levels of lathosterol and campesterol served as independent variables. Adjusted R squared \* = 0.418

**Supplementary Table 2.** Multivariate analyses of the association of baseline plasma sterol levels with changes in total cholesterol and LDL cholesterol levels during statin treatment.

|                                        | Standardized Beta Coefficient | p value |
|----------------------------------------|-------------------------------|---------|
| <i>Δ Total cholesterol model*</i>      |                               |         |
| Age, y                                 | -0.157                        | 0.051   |
| Gender, m/f                            | 0.093                         | 0.255   |
| Treatment, rosuvastatin / atorvastatin | -0.014                        | 0.856   |
| Baseline total cholesterol, mg/dL      | -0.618                        | <0.001  |
| Baseline lathosterol, μmol/L           | -0.003                        | 0.974   |
| Baseline campesterol, μmol/L           | 0.026                         | 0.771   |
| Baseline cholestanol, μmol/L           | 0.054                         | 0.540   |
| <i>Δ LDL cholesterol model†</i>        |                               |         |
| Age, y                                 | -0.152                        | 0.047   |
| Gender, m/f                            | 0.042                         | 0.577   |
| Treatment, rosuvastatin / atorvastatin | 0.161                         | 0.827   |
| Baseline LDL cholesterol, mg/dL        | -0.673                        | <0.001  |
| Baseline lathosterol, μmol/L           | 0.023                         | 0.760   |
| Baseline campesterol, μmol/L           | 0.067                         | 0.437   |
| Baseline cholestanol, μmol/L           | 0.001                         | 0.988   |

In the linear regression models, changes in total cholesterol and LDL cholesterol (in mg/dL) respectively served as outcome variables, while age, gender, statin treatment and baseline levels of total cholesterol (in the total cholesterol model), LDL cholesterol (in the LDL cholesterol model), lathosterol, campesterol and cholestanol served as independent variables. Adjusted R squared \* = 0.347, † = 0.421
